# Supplementary material for: Dispatch guideline adherence and response interval—a study of emergency medical calls in Norway
Source: BMC Emerg Med. 2016 Oct 13;16:40. doi: 10.1186/s12873-016-0105-2 (PMC5064961; doi:10.1186/s12873-016-0105-2)
Supplement: Additional file 2: — Index-113calls work sheet, a data file supporting the conclusions of the article. (XLSX 64 kb) [file 12873_2016_105_MOESM2_ESM.xlsx]

## Sheet: Ark1
Call number	EMCC	Call answered	Ambulance dispatch	EMD response interval	Caller type	Cooperation	Phone number	Location	Consciousness	Responsiveness	Criteria compliance	Urgency	Criteria	Criteria subcode
1	1	08:07:29			2	1	4	4	5	6	2	2	25	25.04
2	1	11:31:01	11:32:04	00:01:03	2	1	3	1	5	5	1	1	27	27.04
3	1	14:16:51	14:26:54	00:10:03	2	1	4	1	5	1	4	2	6	6.01
4	1	15:02:46	15:05:28	00:02:42	3	1	3	1	5	1	0	2	3	3.01
5	1	16:31:28	16:33:43	00:02:15	3	1	4	1	1	5	0	2	6	6.1
6	1	17:29:29			2	1	4	1	1	5	3	2	7	7.03
7	1	19:22:50	19:47:39	00:24:49	1	1	3	1	5	5	3	1	35	35.12
8	1	19:35:05	19:39:31	00:04:26	3	1	4	1	1	1	0	2	6	6.01
9	1	21:26:27	21:34:10	00:07:43	6	1	3	1	4	4	0	2	28	28.05
10	1	06:07:26	06:10:59	00:03:33	3	3	1	1	4	4	0	1	10	10.11
11	1	06:59:26	07:03:27	00:04:01	2		4	1	1	5	5	2	29	29.03
12	1	09:15:06	09:16:03	00:00:57	2	1	4	1	1	5	0	2	35	35.02
13	1	12:22:35	12:30:06	00:07:31	3	3	4	1	5	5	0	2	33	33.04
14	1	14:03:12	14:06:39	00:03:27	2	1	4	2	5	1	0	1	29	29.03
15	1	19:18:32	19:22:47	00:04:15	6	1	4	1	1	5	0	1	1	1.01
16	1	21:25:36	21:27:57	00:02:21	2	1	2	1	5	5	0	1	28	28.03
17	1	21:56:03	22:01:17	00:05:14	3	1	1	1	1	2	0	2	6	6.1
18	1	23:52:24	23:53:40	00:01:16	2	1	4	1	1	5	0	1	27	27.02
19	1	00:26:13			2	2	3	3	5	5	2	2	10	10.01
20	1	02:57:41	03:00:20	00:02:39	2	4	4	1	3	6	0	2	38	38.03
21	1	09:00:33	09:01:43	00:01:10	2		4	1	1	5	0	1	6	6.01
22	1	09:03:52			2	1	4	4	5	5	0	2	16	16.03
23	1	10:39:09	10:43:32	00:04:23	6	1	4	1	5	5	0	1	29	29.03
24	1	11:05:47			2	4	4	1	5	2	1	2	6	6.12
25	1	13:16:25			1	1	4	1	5	5	3	2	10	10.01
26	1	14:39:26	14:43:16	00:03:50	2	1	3	1	1	2	0	1	1	1.03
27	1	16:00:20	16:03:35	00:03:15	2	1	4	2	5	5	1	2	33	33.03
28	1	16:24:20	16:38:09	00:13:49	2	1	4	4	4	4	2	2	33	33.02
29	1	20:07:39			3	1	2	1	5	5	3	2	25	25.01
30	1	20:50:33	20:51:22	00:00:49	2	3	2	1	5	5	0	1	34	34.01
31	1	10:41:38	10:43:41	00:02:03	6	1	4	2	5	5	0	1	6	6.05
32	1	12:22:51	12:23:31	00:00:40	2	1	4	1	1	1	1	2	33	33.1
33	1	15:20:04	15:25:20	00:05:16	2	1	3	2	1	1	0	1	18	18.07
34	1	17:47:01	17:49:04	00:02:03	2	1	3	2	4	4	6	2	33	33.03
35	1	00:57:15	01:06:12	00:08:57	6	1	4	2	5	5	0	2	28	28.03
36	1	03:56:32	03:58:47	00:02:15	1	1	4	1	5	5	0	1	5	5.04
37	1	08:35:23	08:42:27	00:07:04	1	1	3	1	1	1	4	2	6	6.06
38	1	10:04:43	10:06:51	00:02:08	2	1	4	1	1	1	0	2	33	33.05
39	1	11:12:18	11:16:09	00:03:51	5	1	4	1	6	6	0	2	5	5.01
40	1	12:42:22	12:44:44	00:02:22	3		4	1	5	5	0	1	35	35.01
41	1	13:37:48	13:39:56	00:02:08	2	1	4	1	5	5	0	1	10	10.04
42	1	14:37:15	14:42:00	00:04:45	2	1	3	2	5	5	0	2	33	33.04
43	1	19:38:35	19:40:02	00:01:27	3		3	1	1	5	0	2	33	33.1
44	1	19:59:38	20:03:51	00:04:13	6	1	4	1	5	5	1	2	25	25.04
45	1	12:46:00	12:47:00	00:01:00	1	4	4	1	5	5	0	1	6	6.08
46	1	15:49:34	15:57:46	00:08:12	2	1	3	1	5	5	0	2	35	35.05
47	1	16:05:54	16:07:38	00:01:44	2	1	4	1	5	5	1	2	25	25.01
48	1	17:23:32	17:27:24	00:03:52	2	1	3	1	5	5	0	1	10	10.03
49	1	19:06:19	19:07:45	00:01:26	6	1	4	1	5	5	0	1	23	23.02
50	1	21:05:05	21:09:31	00:04:26	6	2	4	3	5	5	1	2	6	6.12
51	2	03:26:37	03:31:13	00:04:36	2	1	4	1	6	6	1	1	29	29.07
52	2	08:33:59	08:35:35	00:01:36	3	1	1	4	5	5	0	1	6	6.04
53	2	08:50:47	08:52:34	00:01:47	3	1	4	1	5	5	0	1	32	32.03
54	2	12:06:26	12:08:07	00:01:41	2	2	3	1	1	5	0	1	6	6.08
55	2	12:14:12	12:14:57	00:00:45	2	1	4	1	1	5	0	1	10	10.03
56	2	14:09:09	14:11:50	00:02:41	3	1	4	3	1	1	0	1	34	34.01
57	2	14:19:21	14:21:20	00:01:59	3	1	1	1	1	5	2	1	27	27.08
58	2	14:38:51	14:40:07	00:01:16	2		4	1	5	5	0	1	29	29.03
59	2	15:24:26	15:25:18	00:00:52	3	1	4	1	6	6	0	1	34	34.01
60	2	15:37:54	15:45:00	00:07:06	2	1	1	1	1	5	5	2	30	30.01
61	2	17:40:06	17:52:42	00:12:36	6		3	1	6	6	0	1	5	5.01
62	2	18:42:13	18:43:38	00:01:25	3	1	1	1	5	5	0	1	23	23.02
63	2	19:22:40	19:26:14	00:03:34	1	1	1	3	5	5	1	1	10	10.1
64	2	21:16:47	21:18:11	00:01:24	3	1	3	1	5	5	0	1	6	6.05
65	2	03:38:22	03:40:50	00:02:28	2	1	4	3	5	5	1	1	6	6.05
66	2	05:42:13	05:44:09	00:01:56	3	1	4	1	1	1	0	1	34	34.01
67	2	07:13:44	07:15:06	00:01:22	6	1	4	1	5	5	1	1	10	10.08
68	2	08:53:46	08:55:06	00:01:20	6	1	2	1	5	5	0	1	1	1.03
69	2	09:48:30	09:51:05	00:02:35	3	1	4	2	4	4	0	1	14	14.05
70	2	11:50:21	11:51:59	00:01:38	3	1	4	1	5	5	0	1	6	6.02
71	2	12:09:24	12:12:23	00:02:59	3	1	1	1	5	5	0	1	6	6.02
72	2	13:07:22	13:08:15	00:00:53	2	1	1	1	1	1	0	1	1	1.03
73	2	14:27:22	14:28:57	00:01:35	6	1	2	3	5	5	0	1	35	35.07
74	2	15:02:58	15:04:42	00:01:44	3	1	1	1	1	2	2	1	6	6.08
75	2	16:27:55	16:31:00	00:03:05	2	1	3	1	5	5	0	1	25	25.04
76	2	17:09:08	17:12:21	00:03:13	3	1	4	3	1	1	0	1	34	34.01
77	2	18:36:55	18:39:00	00:02:05	2	1	4	1	1	5	2	1	6	6.09
78	2	19:28:59	19:41:00	00:12:01	2	1	4	1	5	5	0	1	29	29.02
79	2	23:24:11	23:26:06	00:01:55	2	3	2	1	5	5	0	1	6	6.08
80	2	23:42:38	23:44:00	00:01:22	3	1	1	1	4	4	0	1	34	34.01
81	2	01:20:25			3	3	4	4	5	5	0	1	6	6.08
82	2	01:27:58	01:29:01	00:01:03	3	1	4	1	5	5	0	1	1	1.01
83	2	05:16:33	05:18:19	00:01:46	1	1	3	1	5	5	0	1	10	10.03
84	2	06:27:35	06:33:28	00:05:53	2	1	3	1	5	5	2	2	17	17.05
85	2	06:33:09	06:37:10	00:04:01	1	1	4	1	5	5	0	2	25	25.01
86	2	08:21:10	08:22:10	00:01:00	6	1	2	1	1	5	0	1	27	27.01
87	2	08:36:58	08:48:24	00:11:26	2	4	2	2	4	4	0	2	6	6.09
88	2	09:02:05	09:05:28	00:03:23	6	1	1	1	5	5	4	2	11	11.04
89	2	10:54:58	11:00:18	00:05:20	2	1	4	1	4	4	10	2	6	6.1
90	2	11:36:02	11:42:54	00:06:52	3	1	3	1	5	5	2	2	27	27.06
91	2	13:55:15	13:56:19	00:01:04	3	1	4	1	5	5	4	2	35	35.06
92	2	14:07:51	14:09:01	00:01:10	3	1	4	3	5	5	0	1	27	27.01
93	2	15:13:50	15:14:00	00:00:10	6	1	3	2	2	2	0	1	35	35.02
94	2	17:11:44	17:12:52	00:01:08	2	1	4	1	5	5	0	1	1	1.01
95	2	18:31:01	18:38:54	00:07:53	3	1	1	1	5	5	4	2	6	6.09
96	2	18:35:09	18:35:58	00:00:49	3	1	3	1	1	5	0	1	35	35.02
97	2	20:03:17	20:07:25	00:04:08	3	1	4	1	5	5	2	2	35	35.05
98	2	20:29:53	20:38:43	00:08:50	2	1	4	3	5	5	1	2	35	35.05
99	2	21:12:28	21:15:17	00:02:49	2	1	4	1	5	5	0	1	6	6.09
100	2	21:28:20	21:29:39	00:01:19	6	1	4	2	4	4	0	1	29	29.02
101	4	01:09:18	01:12:16	00:02:58	2		4	1	5	5	0	1	10	10.05
102	4	06:21:14	06:23:10	00:01:56	2	1	4	1	5	5	5	2	25	25.04
103	4	07:47:35	07:54:01	00:06:26	2	1	1	1	1	5	3	2	33	33.02
104	4	07:58:58	08:02:07	00:03:09	3	1	1	1	5	5	9	2	34	34.05
105	4	08:48:03	08:49:21	00:01:18	3	1	4	3	4	4	4	2	33	33.04
106	4	10:23:33	10:25:07	00:01:34	6	1	1	1	1	5	0	1	10	10.03
107	4	11:42:31	11:43:37	00:01:06	3	3	1	1	5	5	0	1	6	6.09
108	4	13:03:08	13:05:28	00:02:20	6	1	1	1	1	1	0	2	33	33.03
109	4	13:53:49	13:55:22	00:01:33	3	1	1	1	1	5	0	2	26	26.03
110	4	14:08:53	14:10:57	00:02:04	6	1	4	1	5	5	1	1	27	27.06
111	4	14:44:10	14:57:30	00:13:20	3	1	1	1	6	6	13	2	6	6.09
112	4	14:49:47	14:59:00	00:09:13	3	1	2	1	1	5	10	2	35	35.02
113	4	17:50:40	17:52:24	00:01:44	3	1	1	1	1	1	5	2	30	30.09
114	4	18:44:50	18:47:09	00:02:19	1	1	4	1	5	5	0	1	10	10.05
115	4	20:17:35	20:20:01	00:02:26	3	1	4	1	1	1	0	1	23	23.02
116	4	23:00:16	23:01:14	00:00:58	2	1	4	1	1	5	0	1	6	6.05
117	4	23:42:14	23:50:57	00:08:43	1	1	4	3	5	5	2	2	11	11.04
118	4	00:27:23			3	3	3	1	5	5	0	2	28	28.05
119	4	02:35:02	02:38:59	00:03:57	3	1	1	1	5	5	2	2	30	30.09
120	4	04:35:40	04:42:03	00:06:23	3	1	4	1	6	6	0	2	30	30.09
121	4	05:21:20	05:23:37	00:02:17	2	1	4	1	1	1	0	1	29	29.07
122	4	08:19:35	08:23:55	00:04:20	2	1	1	2	1	1	6	2	19	19.05
123	4	09:53:16	09:59:14	00:05:58	6	1	3	2	1	5	2	2	35	35.05
124	4	12:18:21	12:20:13	00:01:52	2	1	4	2	1	5	2	1	6	6.09
125	4	13:00:09	13:02:00	00:01:51	3	1	1	2	1	1	0	1	35	35.04
126	4	13:11:18	13:11:33	00:00:15	3	1	4	1	1	1	0	1	30	30.01
127	4	13:32:52	13:48:52	00:16:00	3	1	4	1	1	5	4	2	6	6.06
128	4	16:12:52	16:24:06	00:11:14	6	1	4	1	5	5	2	2	25	25.01
129	4	17:14:51	17:21:57	00:07:06	3	1	4	1	1	1	0	2	35	35.02
130	4	17:51:04	17:52:37	00:01:33	2	1	2	1	5	5	0	1	1	1.03
131	4	18:07:53	18:10:57	00:03:04	2	1	3	1	4	4	0	1	23	23.03
132	4	22:04:47	22:08:23	00:03:36	6	1	4	1	5	5	0	2	6	6.01
133	4	22:30:15	22:32:51	00:02:36	3	1	4	1	1	1	1	1	27	27.05
134	4	01:16:22	01:29:51	00:13:29	1	1	4	1	5	5	0	2	10	10.01
135	4	02:55:55	02:58:03	00:02:08	1	1	4	1	5	5	0	1	10	10.05
136	4	03:01:50	03:03:17	00:01:27	6		4	1	5	5	1	1	11	11.08
137	4	03:18:02	04:02:53	00:44:51	1	1	4	1	5	5	0	2	30	30.01
138	4	04:55:50	05:00:50	00:05:00	3	1	4	1	5	5	0	1	10	10.04
139	4	06:40:29	06:44:21	00:03:52	1	1	4	4	5	5	0	1	10	10.11
140	4	08:25:54	08:41:00	00:15:06	6	4	4	1	2	2	0	2	33	33.1
141	4	10:34:30	10:35:00	00:00:30	2	1	1	1	1	1	0	1	35	35.01
142	4	11:11:30	11:12:43	00:01:13	1	1	3	1	4	4	0	1	29	29.02
143	4	11:54:33	12:00:00	00:05:27	3	1	4	1	1	5	0	2	30	30.09
144	4	15:53:51	15:59:55	00:06:04	3	1	4	1	1	2	0	2	30	30.01
145	4	16:15:46	16:23:53	00:08:07	3	3	3	1	4	4	1	2	33	33.08
146	4	17:54:24	17:55:59	00:01:35	1	1	4	1	5	2	0	2	23	23.02
147	4	19:45:27	19:47:33	00:02:06	2	1	3	2	1	1	0	1	25	25.03
148	4	20:06:37	20:08:23	00:01:46	6	1	4	1	4	4	2	1	29	29.03
149	4	21:25:03	21:28:13	00:03:10	2	1	3	3	5	5	2	1	6	6.08
150	4	12:29:12	12:50:34	00:21:22	6	1	3	3	5	5	9	2	35	35.05
151	5	00:07:30	00:10:14	00:02:44	2	1	1	1	5	5	0	1	17	17.06
152	5	01:50:34	01:56:50	00:06:16	1	2	4	3	5	5	0	1	10	10.04
153	5	05:29:10			1	1	4	2	5	5	6	2	19	19.03
154	5	08:57:46	09:00:49	00:03:03	2		1	1	1	1	1	2	6	6.01
155	5	11:04:18	11:06:04	00:01:46	3	1	1	1	1	1	3	1	10	10.07
156	5	12:16:52	12:18:17	00:01:25	2	1	1	1	5	5	1	1	1	1.03
157	5	16:42:56	16:43:42	00:00:46	3	3	3	1	1	4	1	1	34	34.01
158	5	17:35:55	17:36:42	00:00:47	3	1	3	1	5	5	0	1	1	1.03
159	5	17:39:42	17:42:54	00:03:12	4	3	2	1	6	6	0	1	10	10.03
160	5	18:31:57	18:32:35	00:00:38	1	1	4	3	5	5	3	1	10	10.07
161	5	19:23:25	19:25:02	00:01:37	3	1	4	1	4	4	0	1	34	34.01
162	5	21:02:35	21:03:41	00:01:06	3	1	4	1	6	6	4	1	6	6.09
163	5	21:03:35	21:05:39	00:02:04	2	1	4	4	1	1	12	2	8	8.05
164	5	23:00:29			2	1	4	4	1	1	10	2	6	6.1
165	5	23:26:21	23:29:14	00:02:53	2	1	4	1	2	2	1	1	6	6.09
166	5	04:17:12	04:19:01	00:01:49	2	1	3	1	4	4	0	1	6	6.02
167	5	05:44:43	05:48:17	00:03:34	2	1	4	2	1	1	0	2	6	6.02
168	5	07:16:49	07:17:59	00:01:10	2	1	4	1	5	5	0	1	17	17.02
169	5	12:09:22	12:12:26	00:03:04	3	1	1	1	1	1	0	1	34	34.01
170	5	12:23:24	12:25:50	00:02:26	2	3	1	1	4	4	3	1	10	10.07
171	5	13:50:17	13:52:38	00:02:21	3	2	1	1	1	1	1	1	35	35.1
172	5	15:39:15	15:42:22	00:03:07	2	1	1	1	1	1	1	1	6	6.04
173	5	15:48:36	15:50:24	00:01:48	3	1	1	1	4	4	0	1	34	34.01
174	5	15:59:08			1	1	1	1	5	5	0	2	28	28.06
175	5	17:28:49	17:41:07	00:12:18	2	1	1	1	2	2	4	2	6	6.05
176	5	18:43:31	18:44:27	00:00:56	2	1	1	1	1	5	0	1	23	23.02
177	5	21:12:19	21:16:17	00:03:58	1	1	4	1	5	5	2	2	25	25.01
178	5	22:09:30	22:10:58	00:01:28	2	1	4	1	1	1	0	1	15	15.04
179	5	23:02:02	23:03:17	00:01:15	2	1	3	1	1	1	6	1	27	27.1
180	5	00:36:45	00:39:42	00:02:57	3	1	1	1	4	4	7	2	30	30.09
181	5	01:37:55			1	1	4	1	1	1	2	2	6	6.1
182	5	02:06:01	02:08:55	00:02:54	2	1	2	1	5	5	0	2	28	28.05
183	5	02:44:43	02:48:26	00:03:43	3	1	2	2	1	1	0	1	30	30.01
184	5	04:35:52	04:39:18	00:03:26	1	1	3	1	1	1	1	1	25	25.04
185	5	06:01:16	06:02:09	00:00:53	1	1	4	1	1	1	4	1	10	10.07
186	5	07:36:59	07:40:05	00:03:06	2	1	1	1	1	1	0	1	27	27.06
187	5	08:46:02	08:47:55	00:01:53	2	1	1	1	1	1	3	2	6	6.01
188	5	10:42:16	10:45:56	00:03:40	2	1	1	1	4	4	2	1	30	30.07
189	5	10:43:01	10:47:05	00:04:04	2	1	1	1	2	2	4	1	27	27.06
190	5	12:27:31			1	1	4	1	5	5	1	2	29	29.01
191	5	12:44:06	12:46:45	00:02:39	2	1	1	1	5	5	1	1	25	25.03
192	5	14:29:32	14:30:53	00:01:21	2	1	1	1	1	1	0	1	29	29.02
193	5	15:57:10	15:58:21	00:01:11	2	1	1	1	1	1	0	1	38	38.02
194	5	16:07:59	16:11:35	00:03:36	2	1	1	1	1	1	0	1	33	33.04
195	5	17:49:54			2	1	1	4	2	2	1	2	33	33.04
196	5	19:49:38	19:52:33	00:02:55	1	1	1	1	5	5	0	1	25	25.03
197	5	20:38:47	20:43:00	00:04:13	1	1	1	1	5	5	0	1	10	10.07
198	5	20:48:33	20:54:19	00:05:46	3	1	1	1	6	6	0	1	35	35.14
199	5	21:54:13	21:56:32	00:02:19	3	1	1	1	5	5	0	1	1	1.03
200	6	00:09:16	00:12:48	00:03:32	2	1	3	1	5	5	1	2	6	6.01
201	6	00:47:29			1	1	4	3	5	5	0	2	33	33.1
202	6	01:43:23	01:44:25	00:01:02	8	3	4	1	5	5	0	1	6	6.08
203	6	09:24:00	09:25:29	00:01:29	1	1	4	1	5	5	0	2	35	35.05
204	6	12:34:41	12:35:59	00:01:18	3	3	4	1	1	1	0	1	27	27.03
205	6	13:19:18	13:19:50	00:00:32	3	1	3	1	5	5	0	1	1	1.03
206	6	16:03:59	16:04:39	00:00:40	2	1	3	1	5	5	1	1	27	27.03
207	6	16:06:43	16:10:56	00:04:13	1	1	4	1	5	5	0	1	10	10.03
208	6	17:36:11	17:37:37	00:01:26	2	1	4	1	1	1	0	1	10	10.04
209	6	17:37:09	17:43:37	00:06:28	1	1	4	1	5	5	0	1	10	10.03
210	6	18:46:03	18:46:41	00:00:38	2	1	1	1	1	5	2	1	6	6.05
211	6	19:58:27	20:03:22	00:04:55	2	2	2	1	5	6	0	2	35	35.01
212	6	20:10:19	20:13:20	00:03:01	3	1	4	1	2	6	0	2	33	33.04
213	6	20:23:32	20:27:15	00:03:43	8	1	4	1	5	5	0	2	28	28.05
214	6	20:44:07	20:45:49	00:01:42	2	1	3	1	5	5	0	2	5	5.01
215	6	20:47:24	20:49:22	00:01:58	6	1	1	1	2	2	0	2	5	5.01
216	6	22:43:28	22:44:16	00:00:48	3	1	4	1	2	4	0	1	34	34.01
217	6	00:53:32	00:55:54	00:02:22	6	3	2	1	5	5	0	2	5	5.02
218	6	01:09:27	01:12:00	00:02:33	1	1	4	1	5	5	2	2	25	25.01
219	6	06:03:23	06:06:00	00:02:37	1	1	3	1	5	5	0	2	25	25.01
220	6	06:52:57	07:04:08	00:11:11	3	1	3	1	5	5	6	2	6	6.1
221	6	07:18:19	07:20:51	00:02:32	3	1	4	1	1	1	4	2	30	30.09
222	6	08:33:48	08:36:58	00:03:10	6	1	4	1	5	5	0	1	30	30.03
223	6	08:40:50	08:42:09	00:01:19	6		4	1	2	5	0	1	5	5.02
224	6	10:20:44			8	1	1	4	5	5	0	2	33	33.01
225	6	10:51:43	10:52:38	00:00:55	6	1	2	1	1	1	0	1	1	1.03
226	6	12:34:45	12:36:46	00:02:01	3	1	4	1	1	5	0	1	1	1.01
227	6	13:06:52	13:09:15	00:02:23	6	1	3	1	5	5	0	2	33	33.03
228	6	14:57:30	14:59:34	00:02:04	1	1	2	1	5	5	0	1	27	27.03
229	6	18:34:47	18:38:16	00:03:29	1	1	4	1	5	5	0	1	28	28.05
230	6	19:03:21	19:05:36	00:02:15	1		4	1	5	5	0	1	37	37.02
231	6	19:16:32	19:17:24	00:00:52	2	3	1	1	1	1	0	1	6	6.08
232	6	21:15:37	21:17:33	00:01:56	6	1	4	1	2	4	0	2	5	5.01
233	6	21:41:31	21:42:34	00:01:03	3	1	4	1	1	5	0	1	1	1.03
234	6	22:11:43	22:15:58	00:04:15	6	1	4	1	6	6	0	2	35	35.05
235	6	23:32:18	23:38:00	00:05:42	1	1	4	3	5	5	2	2	6	6.04
236	6	23:55:40	23:57:31	00:01:51	1	1	4	3	5	5	4	2	25	25.04
237	6	01:20:42	01:22:07	00:01:25	3	1	4	1	5	5	0	2	6	6.1
238	6	04:17:11	04:18:58	00:01:47	3	2	4	1	5	5	0	1	1	1.03
239	6	05:02:28	05:03:37	00:01:09	3	1	4	1	1	5	0	2	28	28.05
240	6	05:15:13	05:16:12	00:00:59	6	1	4	2	6	6	0	1	23	23.03
241	6	09:50:17	09:57:11	00:06:54	6	1	3	2	4	4	5	2	35	35.05
242	6	10:23:37	10:32:28	00:08:51	2	1	4	1	1	1	0	2	5	5.02
243	6	11:25:09	11:30:04	00:04:55	1	1	1	1	5	5	0	1	29	29.02
244	6	12:25:37	12:31:50	00:06:13	3	1	4	1	1	5	0	1	23	23.02
245	6	16:13:31	16:17:22	00:03:51	6	1	3	1	4	4	2	1	10	10.06
246	6	17:00:58	17:03:43	00:02:45	6	1	4	2	5	5	0	1	27	27.04
247	6	17:44:20	17:45:33	00:01:13	2	1	4	1	1	1	0	1	10	10.03
248	6	23:35:05			3	2	4	4	4	4	0	2	30	30.09
249	6	23:36:50	23:39:48	00:02:58	2	1	4	1	1	5	5	2	6	6.06
250	7	00:29:42	00:32:53	00:03:11	1	1	4	1	5	5	2	2	29	29.01
251	7	00:40:31	00:44:57	00:04:26	2	1	4	1	5	5	0	2	33	33.03
252	7	05:04:11	05:06:28	00:02:17	2	1	4	1	1	5	0	1	10	10.05
253	7	10:26:18	10:31:11	00:04:53	3	1	3	1	6	6	0	1	18	18.02
254	7	10:28:08	10:30:03	00:01:55	3	1	4	1	5	5	1	1	27	27.05
255	7	10:46:12	10:50:15	00:04:03	3	1	1	1	4	4	0	1	29	29.03
256	7	10:59:16	11:01:27	00:02:11	1	1	4	1	5	5	0	1	9	9.04
257	7	13:07:24	13:09:49	00:02:25	3	1	4	2	1	1	0	1	25	25.04
258	7	13:34:44	13:37:32	00:02:48	2	3	4	1	5	5	0	1	6	6.08
259	7	13:35:27	13:40:00	00:04:33	2	1	3	1	5	5	0	1	32	32.02
260	7	18:01:12	18:03:35	00:02:23	2	1	4	1	5	5	0	1	1	1.03
261	7	18:02:00	18:10:45	00:08:45	1	1	2	1	5	5	0	2	6	6.09
262	7	18:54:33	18:56:04	00:01:31	6	1	4	1	4	4	5	1	29	29.08
263	7	22:37:09	22:41:29	00:04:20	1	1	4	1	5	5	0	1	6	6.01
264	7	01:46:31	01:47:25	00:00:54	2	1	4	1	1	5	0	1	1	1.03
265	7	01:56:26	01:57:57	00:01:31	2	1	4	1	1	4	1	2	29	29.01
266	7	08:58:54	09:04:58	00:06:04	1	4	4	1	5	5	2	2	25	25.01
267	7	12:20:26	12:23:25	00:02:59	3	1	1	1	5	5	1	1	10	10.04
268	7	12:21:56	12:23:53	00:01:57	2	1	4	1	5	5	0	1	27	27.03
269	7	12:27:23	12:29:51	00:02:28	1	1	4	1	5	5	0	1	10	10.03
270	7	12:42:35	12:46:06	00:03:31	2	1	4	1	1	5	0	1	35	35.02
271	7	12:42:59	12:44:33	00:01:34	3	1	4	1	5	5	0	1	30	30.01
272	7	13:48:09	13:51:55	00:03:46	3	4	4	1	1	5	2	1	35	35.12
273	7	14:02:53	14:05:56	00:03:03	3	1	2	1	1	5	0	2	33	33.03
274	7	15:00:01	15:01:04	00:01:03	3	1	4	1	1	5	0	1	6	6.04
275	7	15:07:58	15:08:39	00:00:41	3	1	4	1	1	5	5	1	6	6.09
276	7	15:36:03	15:41:22	00:05:19	1	1	4	1	5	5	2	2	10	10.01
277	7	16:21:01	16:23:45	00:02:44	3	1	4	1	1	1	0	1	23	23.04
278	7	17:38:25	17:41:05	00:02:40	2	1	4	1	1	5	0	1	6	6.05
279	7	17:56:58	17:59:10	00:02:12	2	1	4	1	5	5	0	1	27	27.04
280	7	18:04:12	18:05:00	00:00:48	3	1	4	1	5	5	0	2	33	33.04
281	7	18:04:33	18:06:28	00:01:55	2	1	4	1	5	5	0	1	2	2.04
282	7	20:04:54			1	1	4	1	5	5	3	2	19	19.01
283	7	22:49:18	22:58:53	00:09:35	3	1	4	1	5	5	2	2	25	25.04
284	7	22:55:22	23:00:33	00:05:11	3	1	4	1	5	5	0	2	30	30.09
285	7	23:41:48	23:46:06	00:04:18	3	1	4	1	5	5	4	2	30	30.09
286	7	02:23:55	02:27:22	00:03:27	1	1	1	1	1	1	0	1	10	10.02
287	7	03:30:39	03:32:50	00:02:11	8	3	4	1	5	5	0	1	37	37.02
288	7	05:49:42	05:56:10	00:06:28	1	1	4	1	1	1	2	2	10	10.04
289	7	06:31:33	06:32:52	00:01:19	2	1	4	1	5	5	0	1	10	10.04
290	7	08:14:34			1	1	4	1	1	1	1	2	25	25.01
291	7	10:49:28	10:50:46	00:01:18	1	1	4	1	1	1	0	1	29	29.02
292	7	12:28:50	12:32:09	00:03:19	2	1	4	1	1	5	0	1	27	27.05
293	7	17:26:10	17:27:32	00:01:22	2	1	4	1	1	5	0	1	6	6.05
294	7	17:29:08	17:30:45	00:01:37	2	1	4	1	1	5	2	1	6	6
295	7	20:05:58	20:12:18	00:06:20	6	1	4	1	5	5	1	2	30	30.01
296	7	20:13:09	20:22:18	00:09:09	1	1	4	1	5	5	0	2	28	28.03
297	7	22:34:46	22:36:35	00:01:49	1	1	4	1	5	5	0	1	1	1.03
298	7	23:09:57	23:13:20	00:03:23	2	1	4	1	5	5	0	1	30	30.01
299	7	23:58:51	00:00:45	00:01:54	3	1	4	1	2	4	0	2	30	30.06

## Sheet: Ark2
Call number
EMCC
Call answered
Ambulance dispatch
EMD response interval
Caller type	1=Patient	2=Next of kin	3=Bystander	4=Local Emergency Communication Centre	5=Genereal pratcitioner	6=Health peronnel, unspecified	7=Volunteers	8=Police/Fire
Cooperation	1=Yes	2=No	3=Caller not on scene	4=Language difficulties
Phone number	1=Yes, within 1 min	2=yes, within 2 min	3=Yes, after 2 min	4=No
Location	1=Yes, within 1 min	2=yes, within 2 min	3=Yes, after 2 min	4=No
Consciousness	1=Yes, within 1 min	2=yes, within 2 min	3=Yes, after 2 min	4=No	5=Spontan information within 1 min	6=Spontan information within 2 min
Responsiveness	1=Yes, within 1 min	2=yes, within 2 min	3=Yes, after 2 min	4=No	5=Spontan information within 1 min	6=Spontan information within 2 min
Criteria compliance
Urgency	1=Acute	2=Urgent	3=Non-urgent
Criteria
Criteria subcode
