# Supplementary material for: Dispatch guideline adherence and response interval—a study of emergency medical calls in Norway
Source: Springer Nature journal article supplement (doi:10.1186/s12873-016-0105-2), 2016-10-13
Supplement: MOESM1 [file 12873_2016_105_MOESM1_ESM.pdf]

# NORSK INDEKS FOR MEDISINSK NØDHJELP – BRUK AV INDEKS LYDLOGGPROSJEKT

Sentral: \_\_\_\_\_ AMIS: \_\_\_\_\_ Dato: \_\_\_\_\_ Klokken: \_\_\_\_\_

Hovedproblem: \_\_\_\_\_

Innringer: \_\_\_\_\_ (pasient, helsepersonell...)

Innringer samarbeider: Ja  Nei   Tredjehåndsinopplysninger

## STARTKORT

HVOR - Hvor er pasienten/ulykken?

|                                      | Ja | Nei | Tid til avklart (</> 1 min) | Score |
|--------------------------------------|----|-----|-----------------------------|-------|
| Adresse/stedsbeskrivelse verifisert? |    |     |                             |       |
| Tlf.nr verifisert?                   |    |     |                             |       |

HVA - Hva er problemet?

---



---



---

VÅKEN - Er pas. våken og i stand til å snakke?

| Spm. stilt/registrert              | Ja | Åpenb/unødv | Nei | Tid til avklart ( 1 min) | Score |
|------------------------------------|----|-------------|-----|--------------------------|-------|
| Er pasienten våken?                |    |             |     |                          |       |
| Er pasienten i stand til å snakke? |    |             |     |                          |       |
| Reagerer på tilrop og risting?     |    |             |     |                          |       |
| Alder?                             |    |             |     |                          |       |
| Kjønn?                             |    |             |     |                          |       |
| Navn?                              |    |             |     |                          |       |
| Full ID?                           |    |             |     |                          |       |
| Fastlege?                          |    |             |     |                          |       |

|                           |  |                                   |  |
|---------------------------|--|-----------------------------------|--|
| <b>STARTKORT</b>          |  | <b>RESPONS</b>                    |  |
| <b>TILSTAND/HASTEGRAD</b> |  | <b>RÅD/VEILEDNING/INSTRUKSJON</b> |  |
| <b>TOTALT:</b>            |  |                                   |  |

## TILSTAND / HASTEGRAD

Satt kriterie \_\_\_\_\_ Satt hastegrad \_\_\_\_\_ Enig? \_\_\_\_\_

| A  | Ja | Åpenb/unødv | Nei | H  | Ja | Åpenb/unødv | Nei | V  | Ja | Åpenb/unødv | Nei |
|----|----|-------------|-----|----|----|-------------|-----|----|----|-------------|-----|
| 01 |    |             |     | 01 |    |             |     | 01 |    |             |     |
| 02 |    |             |     | 02 |    |             |     | 02 |    |             |     |
| 03 |    |             |     | 03 |    |             |     | 03 |    |             |     |
| 04 |    |             |     | 04 |    |             |     | 04 |    |             |     |
| 05 |    |             |     | 05 |    |             |     | 05 |    |             |     |
| 06 |    |             |     | 06 |    |             |     | 06 |    |             |     |
| 07 |    |             |     | 07 |    |             |     | 07 |    |             |     |
| 08 |    |             |     | 08 |    |             |     | 08 |    |             |     |
| 09 |    |             |     | 09 |    |             |     | 09 |    |             |     |
| 10 |    |             |     | 10 |    |             |     | 10 |    |             |     |
| 11 |    |             |     | 11 |    |             |     | 11 |    |             |     |
| 12 |    |             |     | 12 |    |             |     | 12 |    |             |     |
| 13 |    |             |     | 13 |    |             |     | 13 |    |             |     |
| 14 |    |             |     | 14 |    |             |     | 14 |    |             |     |

Vurdert kriterie \_\_\_\_\_ Vurdert hastegrad \_\_\_\_\_

## RESPONS

|                                 | Ja | Åpenb./unødv | Nei | Score | Kommentar |
|---------------------------------|----|--------------|-----|-------|-----------|
| Tiltak ihht hastegrad/kriterie? |    |              |     |       |           |
| Legevaktlege alarmert?          |    |              |     |       |           |

## RÅD/VEILEDNING/INSTRUKSJON

|                        | Ja | Åpenb./unødv. | Nei | Score | Kommentar |
|------------------------|----|---------------|-----|-------|-----------|
| Riktig å tilby RVI?    |    |               |     |       |           |
| Mulig å tilby RVI?     |    |               |     |       |           |
| RVI tilbudt?           |    |               |     |       |           |
| RVI korrekt?           |    |               |     |       |           |
| Instruksjon akseptert? |    |               |     |       |           |
